# Supplementary material for: Neural Correlates of Temporal Credit Assignment in the Parietal Lobe
Source: PubMed Central journal article supplement (PMC3921206; doi:10.1371/journal.pone.0088725), 2014-02-11

**MAIN TASK**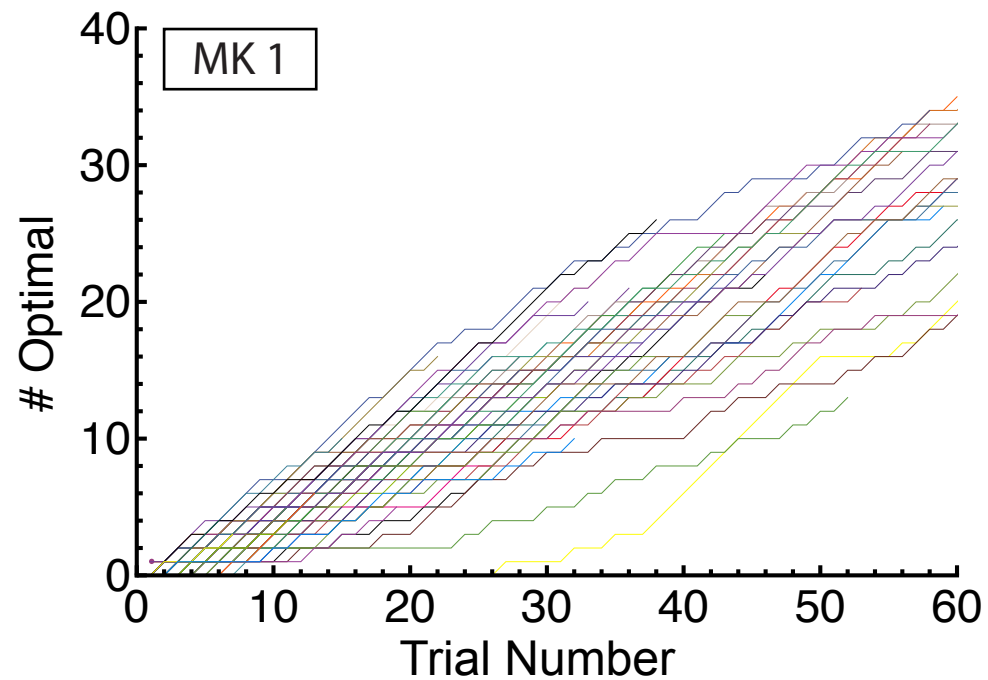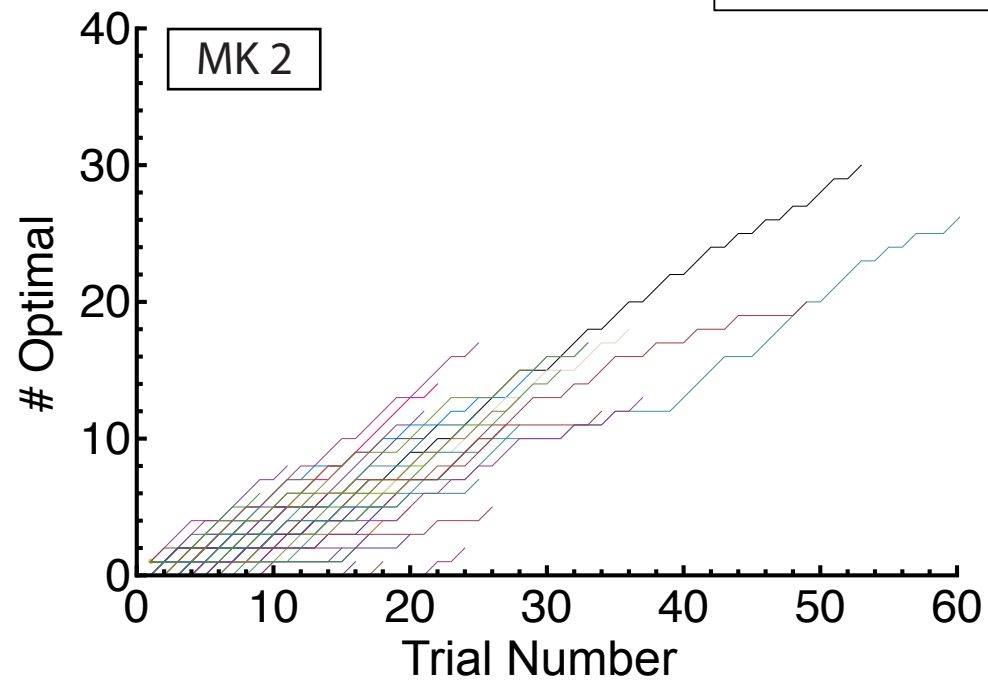**CONTROL TASK**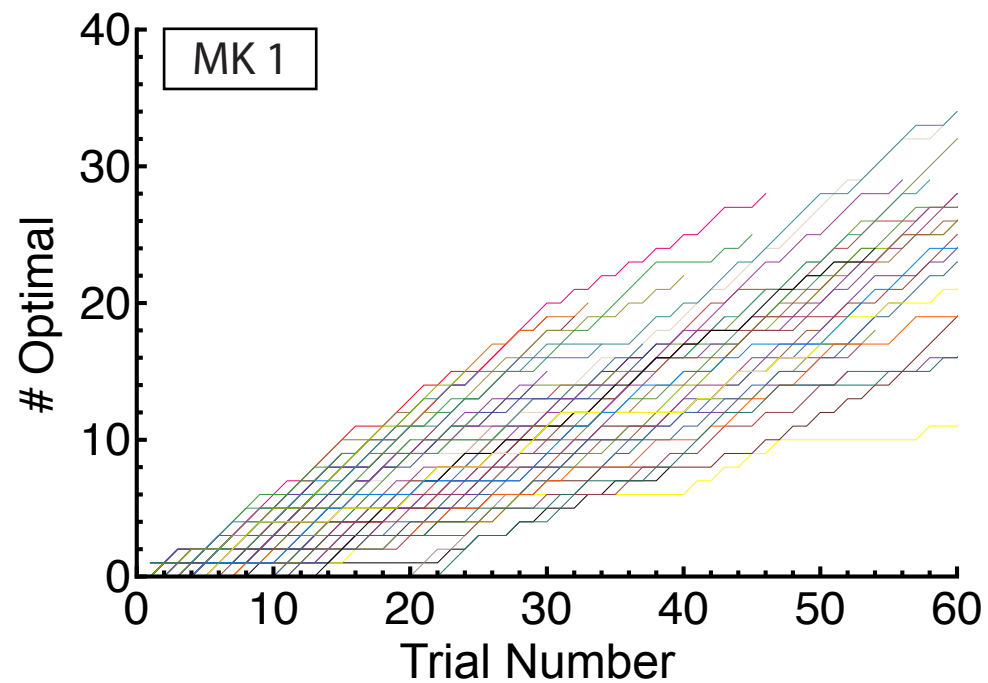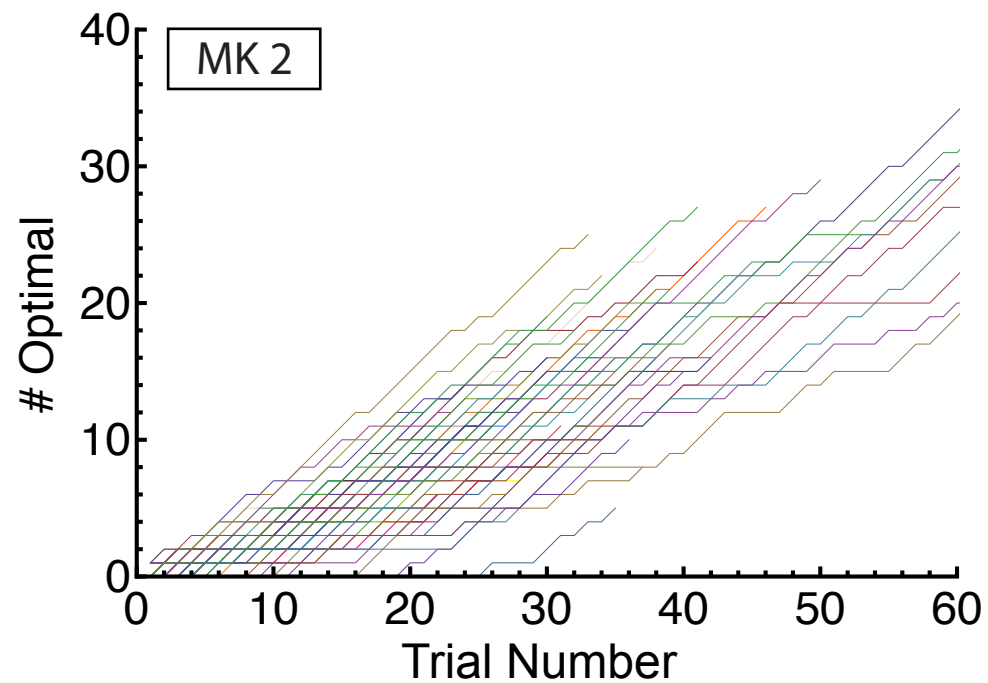

Supplement: pone.0088725.s001.pdf [file pone.0088725.s001.pdf]
