# Supplementary material for: Neural Correlates of Temporal Credit Assignment in the Parietal Lobe
Source: PubMed Central journal article supplement (PMC3921206; doi:10.1371/journal.pone.0088725), 2014-02-11

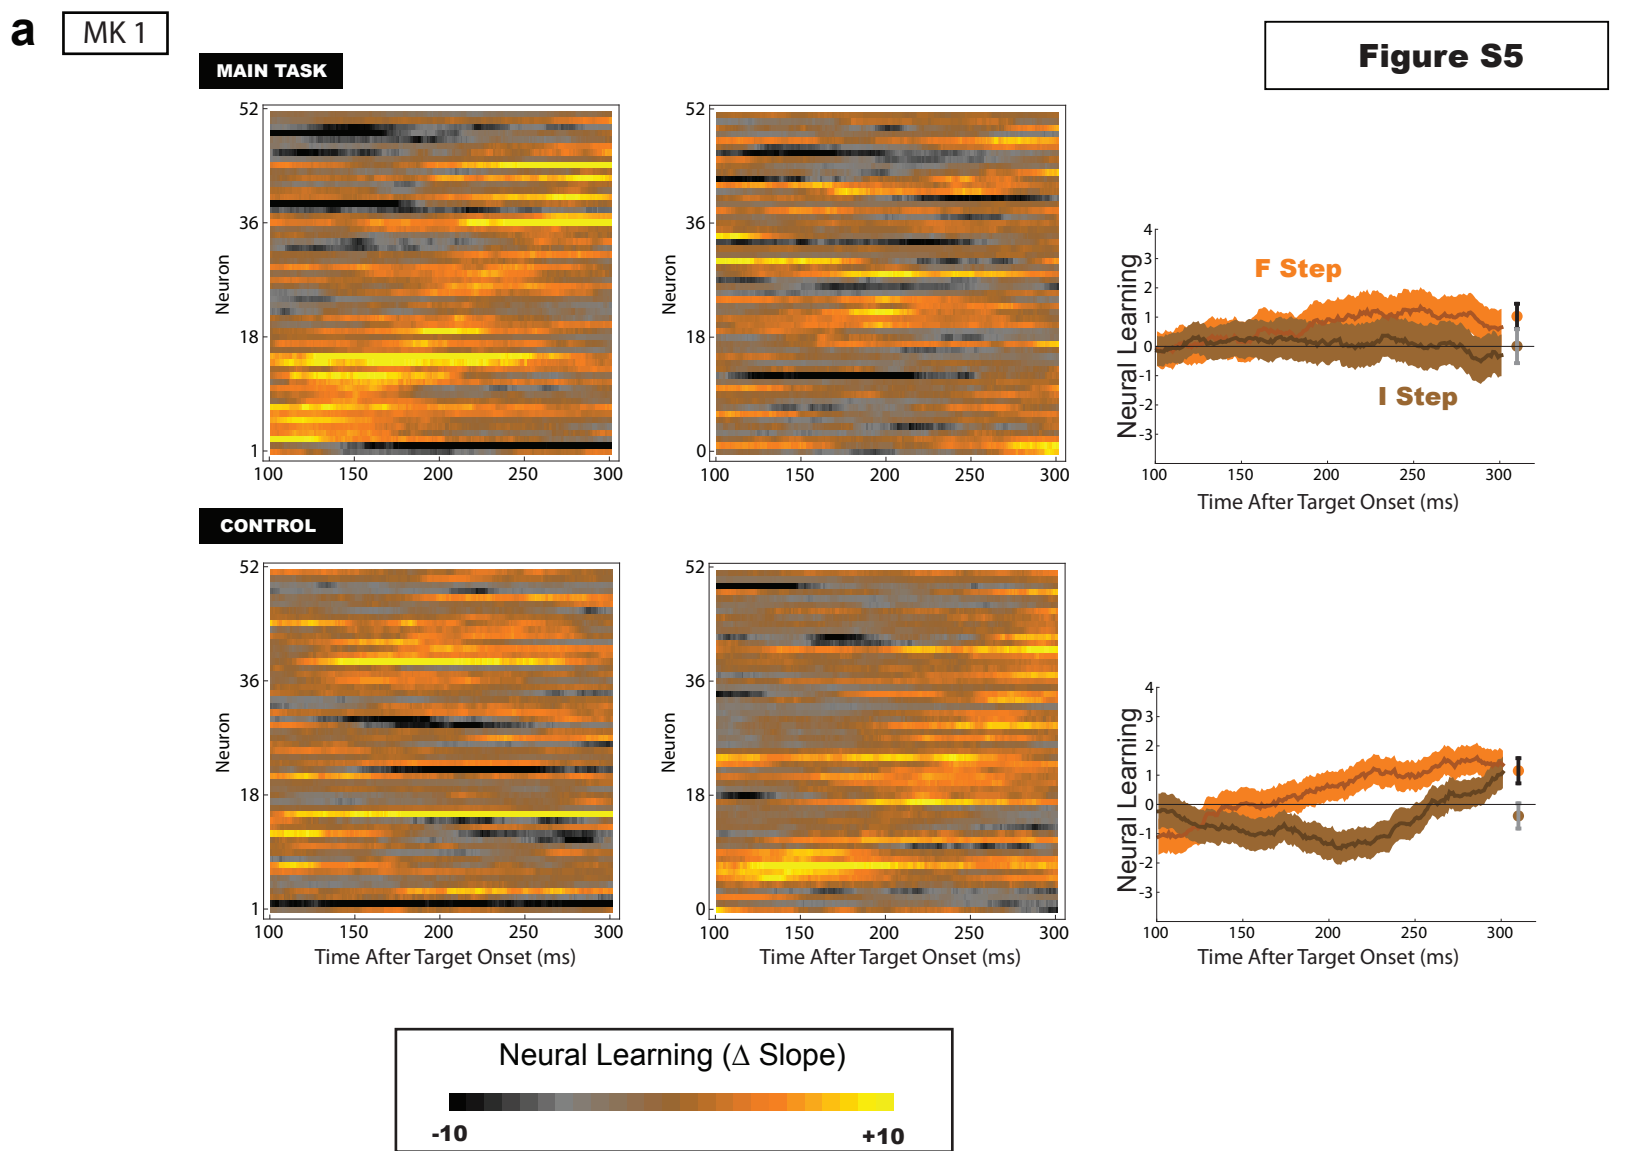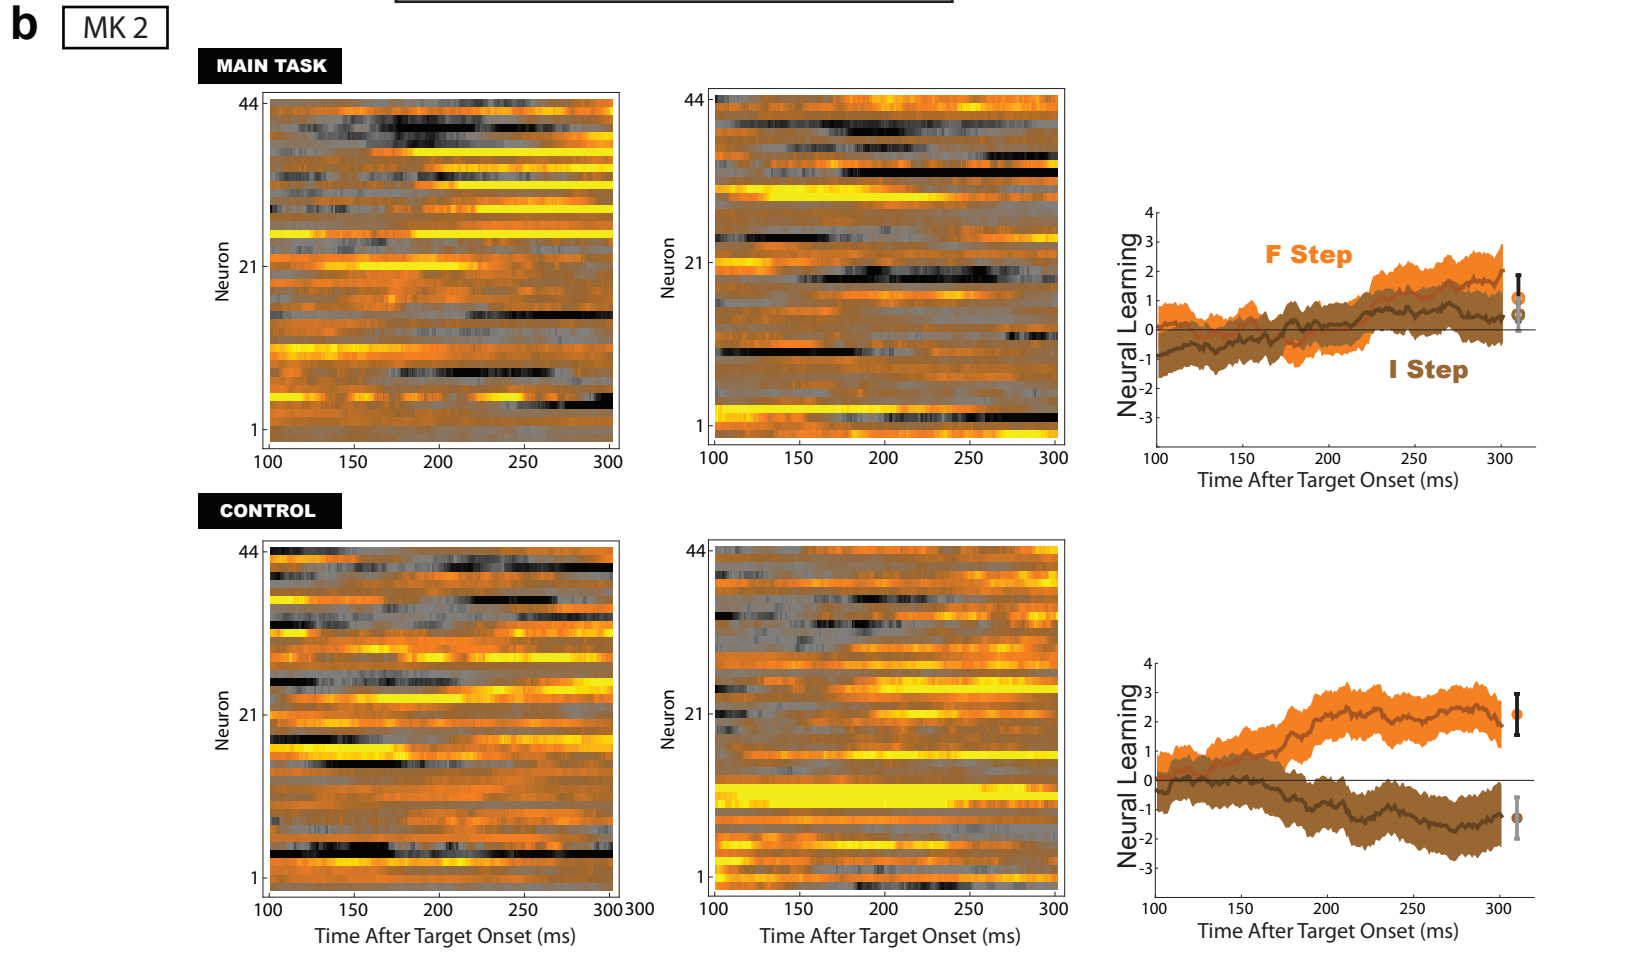

Supplement: pone.0088725.s005.pdf [file pone.0088725.s005.pdf]
